# Supplementary material for: HIF-independent actions of HIF-prolyl hydroxylase inhibitors reveal off-target pathways with therapeutic implications
Source: Research Square preprint supplement (doi:10.21203/rs.3.rs-8582402/v1), 2026-01-14
Supplement: Supplementary file 1 [file 0f8a686bf12e9e81b766461a.pdf]

## Supplementary data for

# HIF-independent actions of HIF-prolyl hydroxylase inhibitors reveal off-target pathways with therapeutic implications

Daniela Mennerich<sup>1\*</sup>, Fawzi Khoder-Agha<sup>1</sup>, Mustafa Beter<sup>2</sup>, Seppo Ylä-Herttuala<sup>2</sup> and Thomas Kietzmann<sup>1\*</sup>

<sup>1</sup>Faculty of Biochemistry and Molecular Medicine, and Biocenter Oulu, University of Oulu, FI-90014 University of Oulu, Finland

<sup>2</sup> A.I. Virtanen Institute for Molecular Sciences, University of Eastern Finland, FI-70211 Kuopio, Finland

## Contents

**Figure S1. High concentrations of roxadustat and molidustat inhibit cell viability.**

**Figure S2. Roxadustat and molidustat induce HIF-target gene expression as well as HRE-Luc activity.**

**Figure S3. High concentrations of roxadustat and molidustat inhibit cell proliferation.**

**Figure S4. Roxadustat and molidustat do not affect cell adhesion.**

**Figure S5. Roxadustat and molidustat do not increase reactive oxygen species.**

**Figure S6. Roxadustat affects angiogenesis in HUVEC cells.**

**Figure S7. Correlation of the RNA-seq samples.**

**Figure S8. Venn diagrams of all different treatment groups.**

**Figure S9. Top 20 up- and downregulated genes in  $\Delta$ HIF1 $\Delta$ EPAS1 cells treated with roxadustat.**

**Figure S10. Top 20 up- and downregulated genes in  $\Delta$ HIF1 $\Delta$ EPAS1 cells treated with molidustat.**

**Table S1: Nucleotide sequences used for CRISPR-Cas9 primers.**

**Table S2: List of antibodies used in the study.**

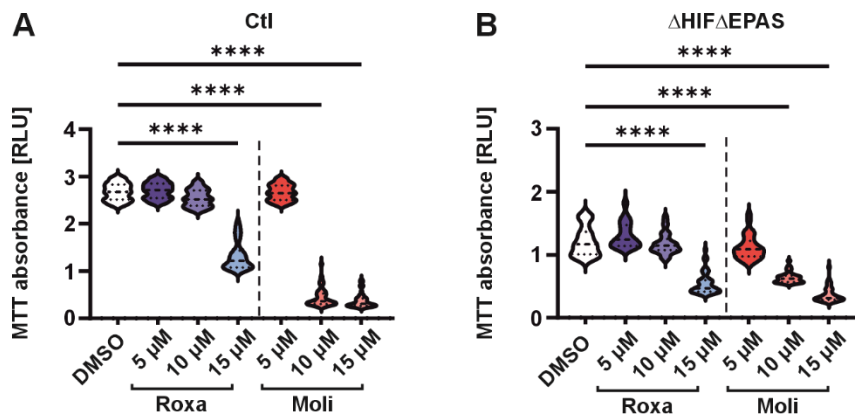

**Figure S1. High concentrations of roxadustat and molidustat inhibit cell viability.**

**(A,B)** PC-3 control (Ctl) and  $\Delta$ HIF1 $\Delta$ EPAS1 cells were cultured for 24 h, then treated with roxadustat (Roxa) or molidustat (Moli) at different concentrations, and further cultured for 24 h. Thereafter, an MTT assay was performed.

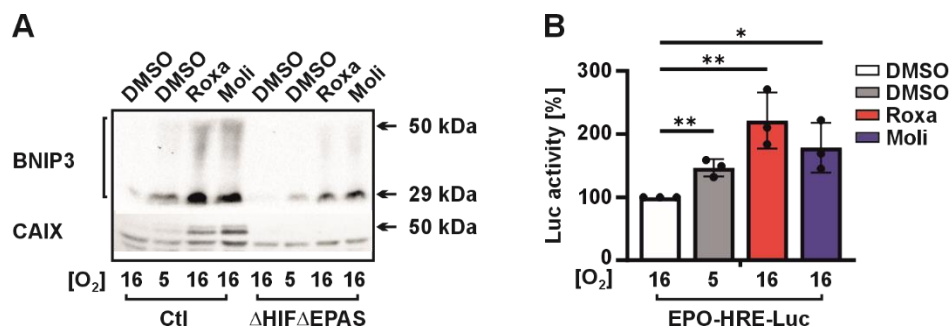

**Figure S2. Roxadustat and molidustat induce HIF-target gene expression as well as HRE-Luc activity.**

**(A)** PC-3 control (Ctl) and  $\Delta$ HIF1 $\Delta$ EPAS1 cells were cultured for 24 h, then treated with either roxadustat (Roxa) or molidustat (Moli) and further cultured under normoxia or hypoxia (5%O<sub>2</sub>) for 16 h. Total protein levels were measured by Western blot with antibodies against BNIP3, CAIX and  $\alpha$ -tubulin. **(B)** HEK 293 cells were transfected with an EPO-HRE-Luc expression plasmid for 5 h. After a medium change, cells were treated with roxadustat (Roxa) or molidustat (Moli) and further cultured under normoxic or hypoxic (5%O<sub>2</sub>) conditions for 24 h.

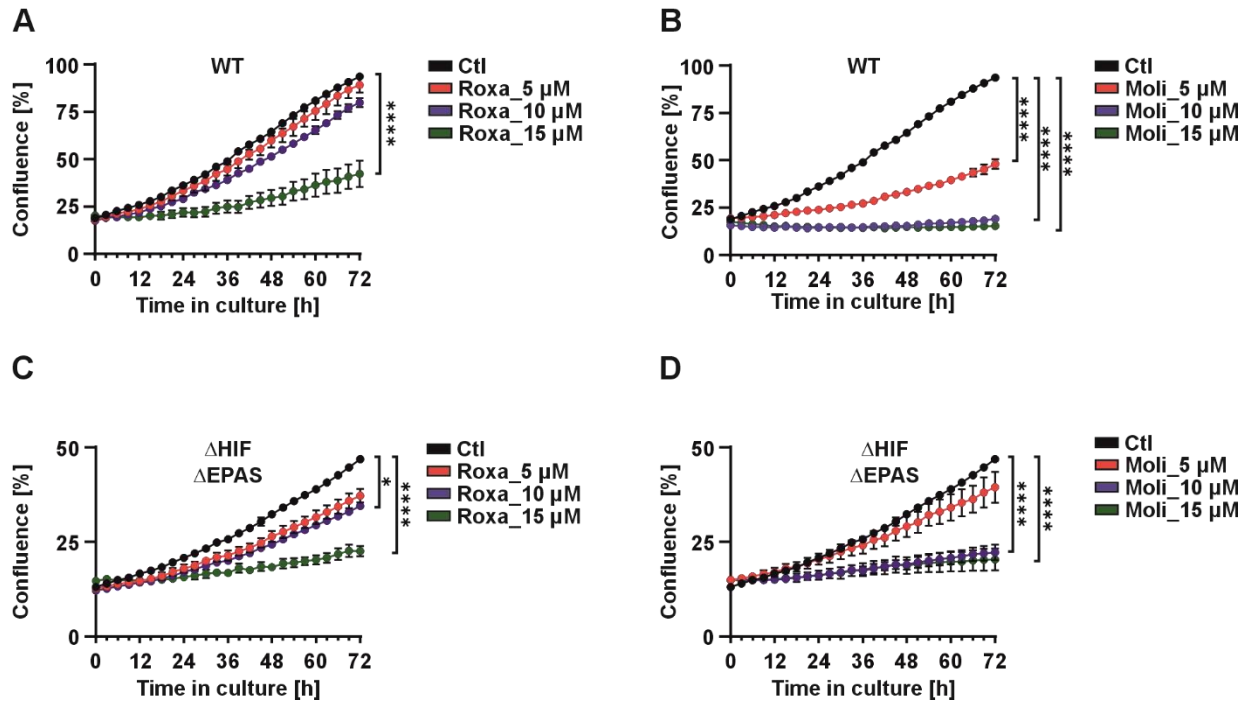

**Figure S3. High concentrations of roxadustat and molidustat inhibit cell proliferation.**

(A - D) PC-3 control (Ctl) and  $\Delta$ HIF1 $\Delta$ EPAS1 cells were cultured for 16 h, after which they were treated with roxadustat (Roxa) or molidustat (Moli) at different concentrations. The live cell proliferation rate was measured with the InCucyte®ZOOM every 3 h for 72 h.

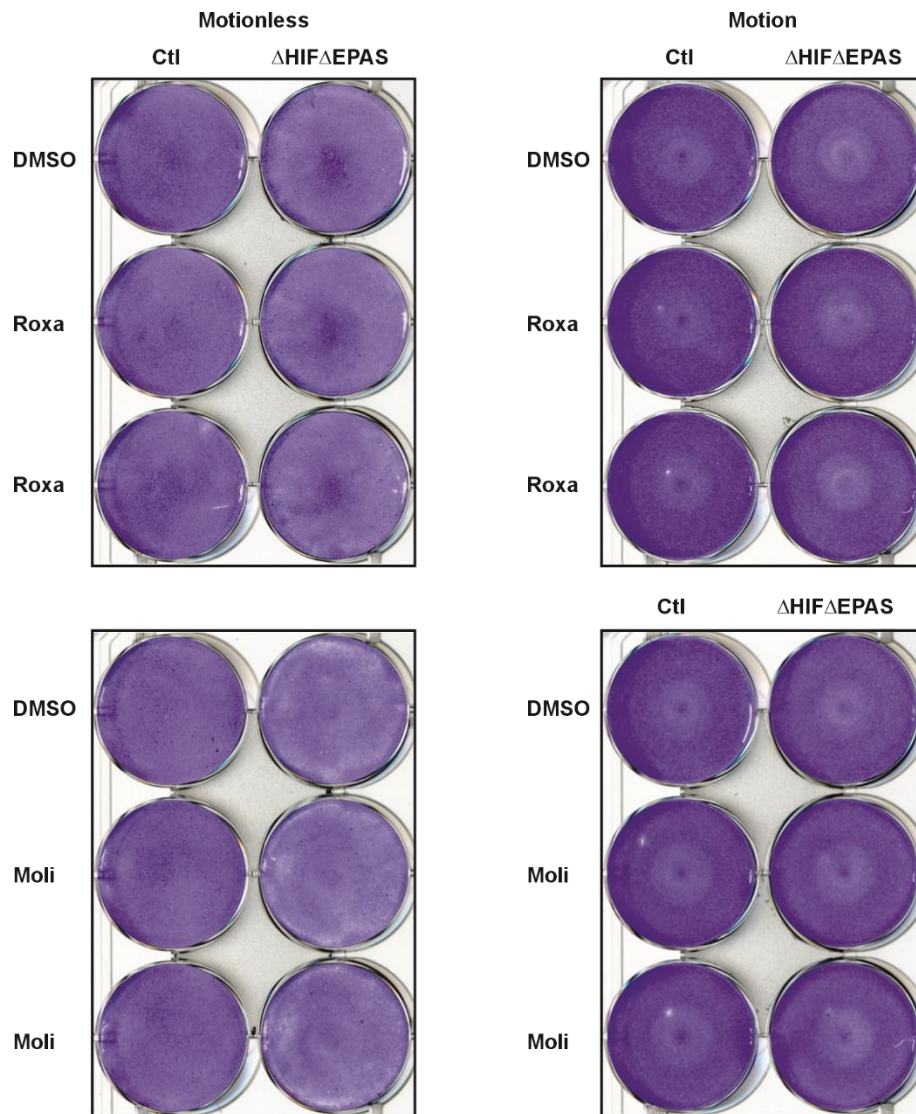

43

44 **Figure S4. Roxadustat and molidustat do not affect cell adhesion.**

45 PC-3 control (Ctl) and  $\Delta$ HIF1 $\Delta$ EPAS1 cells were plated on 6-well plates and grown until confluence was  
 46 reached. The cells were then treated with roxadustat (Roxa; 10  $\mu$ M) or molidustat (Moli; 5  $\mu$ M) and further  
 47 cultured for 24 h. Thereafter, the plates were transferred to an orbital shaker for an additional 8 h. Control  
 48 plates remained in the cell incubator.

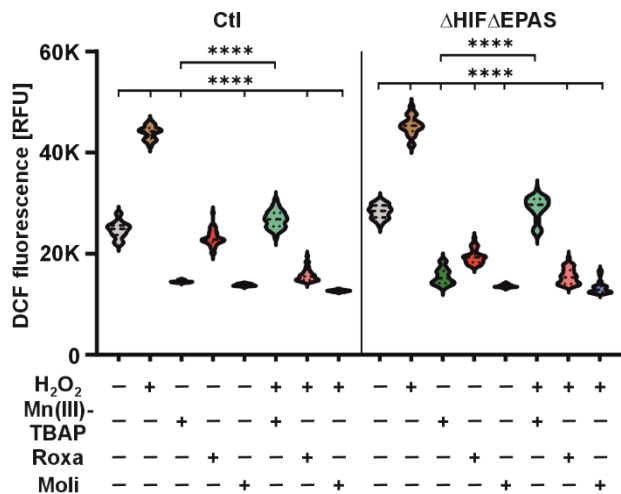

**Figure S5. Roxadustat and molidustat do not increase reactive oxygen species.**

PC-3 control cells (Ctl) and ΔHIF1ΔEPAS1 cells were treated with roxadustat (10 μM), molidustat (5 μM) or Mn(III)TBAP (20 μM) for 24 h and then stimulated with H<sub>2</sub>O<sub>2</sub> (500 μM) for additional 30 min.

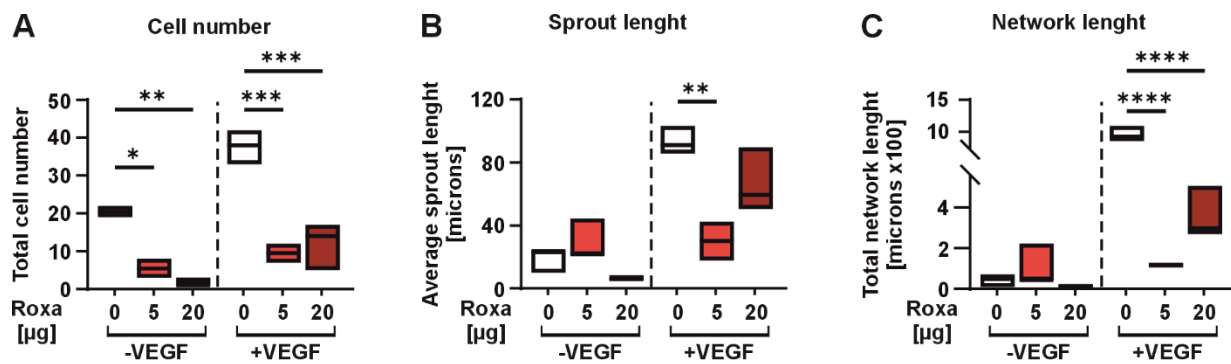

**Figure S6. Roxadustat affects angiogenesis in HUVEC cells.**

Quantification of the angiogenesis assay in HUVEC cells after 3 days of roxadustat (Roxa) treatment for 3 days: **(A)** cell number, **(B)** sprout length, and **(C)** network length.

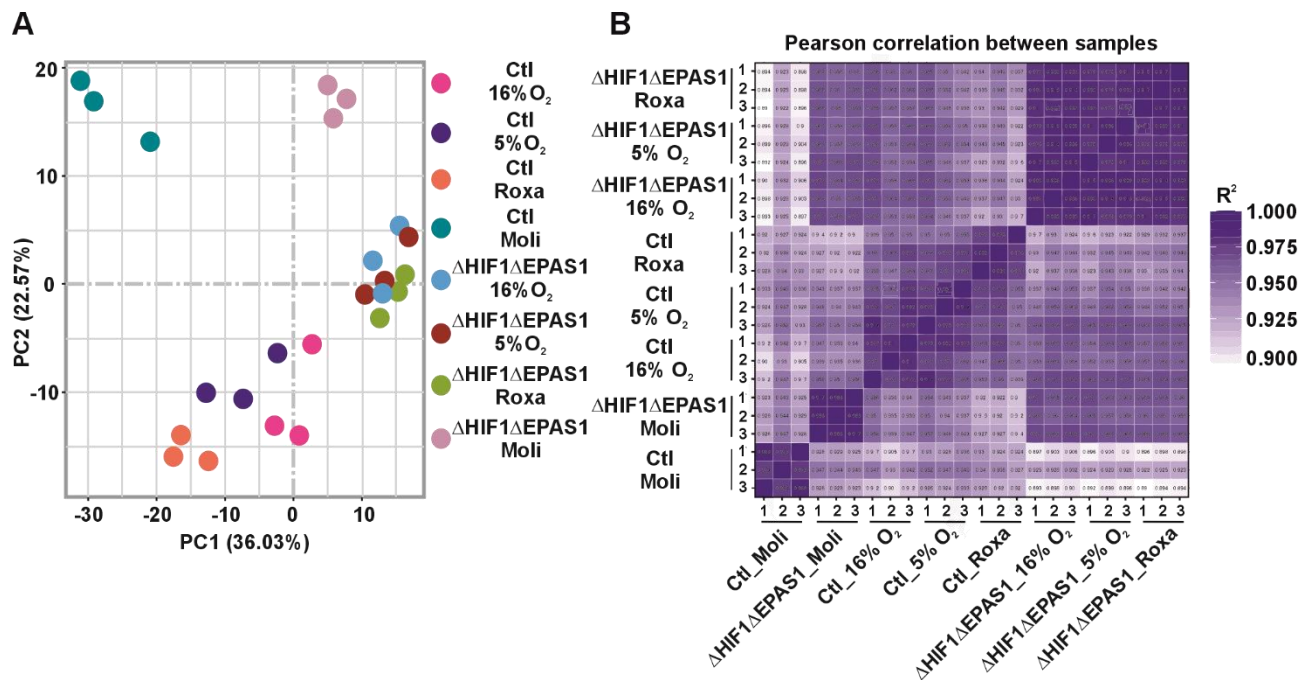

**Figure S7. Correlation of the RNA-seq samples.**

**(A)** Principal component analysis (PCA) was performed on normalized gene expression data from all samples. Each point represents an individual sample and is colored by experimental group. **(B)** Pearson correlation between the samples.

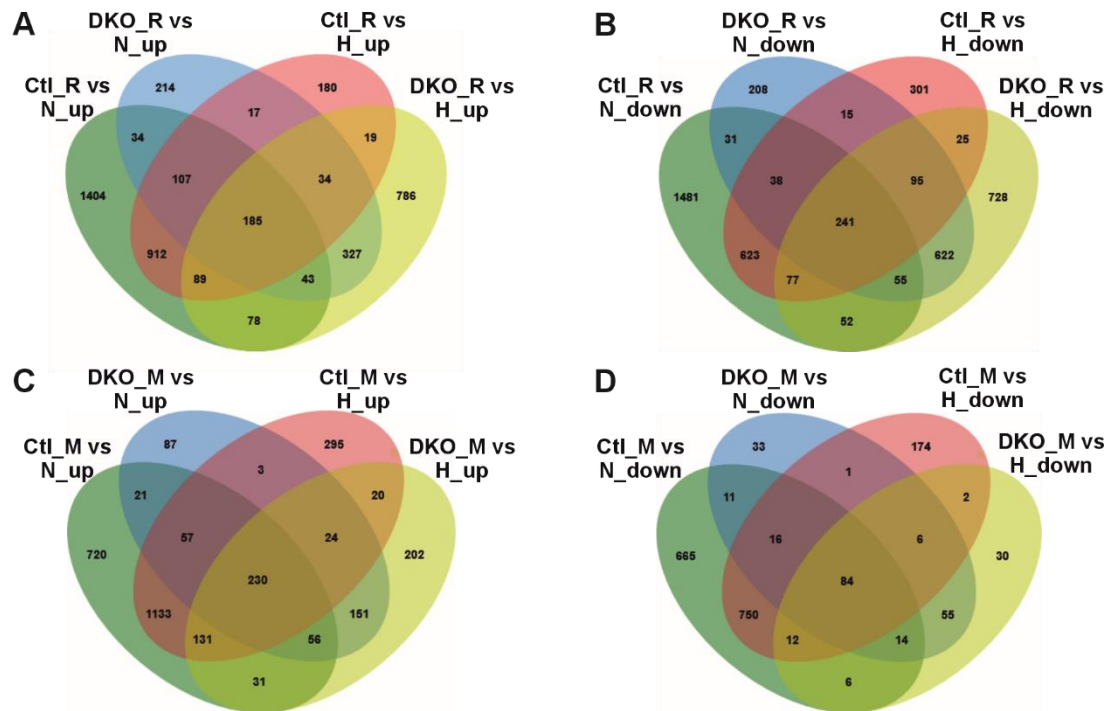

**Figure S8. Venn diagrams of all different treatment groups.**

Venn diagrams of differentially expressed unique and shared genes. **(A)** Upregulated genes in control (Ctl) or  $\Delta$ HIF1 $\Delta$ EPAS1 (DKO) cells upon roxadustat (R) treatment. **(B)** Down-regulated genes in control (Ctl) or  $\Delta$ HIF1 $\Delta$ EPAS1 (DKO) cells upon roxadustat (R) treatment. **(C)** Upregulated genes in control (Ctl) or  $\Delta$ HIF1 $\Delta$ EPAS1 (DKO) cells upon molidustat (M) treatment. **(D)** Down-regulated genes in control (Ctl) or  $\Delta$ HIF1 $\Delta$ EPAS1 (DKO) cells upon molidustat (M) treatment.

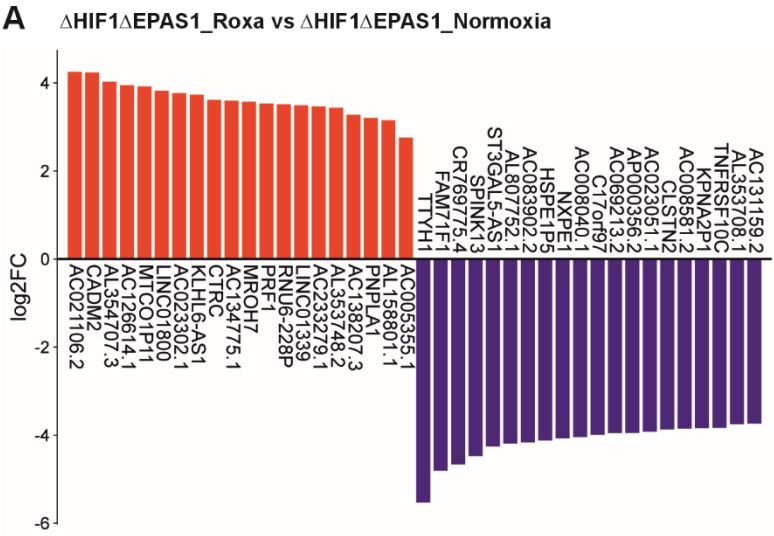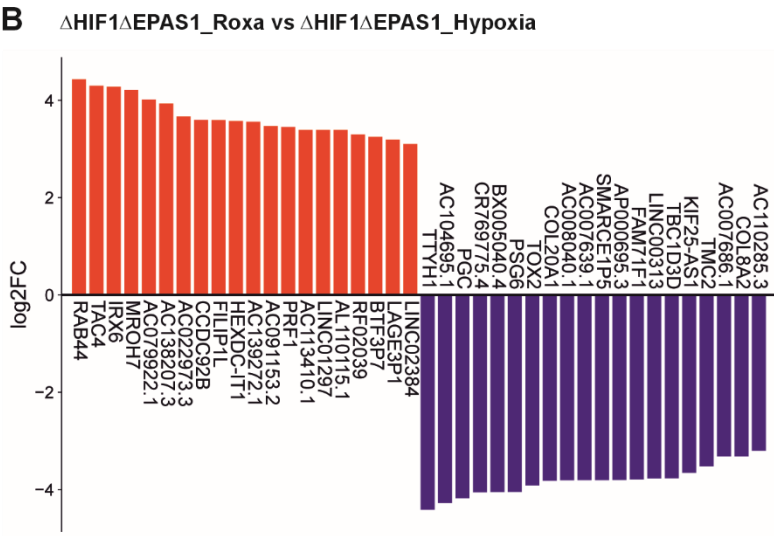

**Figure S9. Top 20 up- and downregulated genes in  $\Delta$ HIF1 $\Delta$ EPAS1 cells treated with roxadustat.**

**(A)** Most up- and downregulated genes in  $\Delta$ HIF1 $\Delta$ EPAS1 cells upon roxadustat (Roxa) treatment compared to normoxia. **(B)** Most up- and downregulated genes in  $\Delta$ HIF1 $\Delta$ EPAS1 cells upon roxadustat (Roxa) treatment compared to hypoxic conditions.



**A**  $\Delta$ HIF1 $\Delta$ EPAS1\_Moli vs  $\Delta$ HIF1 $\Delta$ EPAS1\_Normoxia

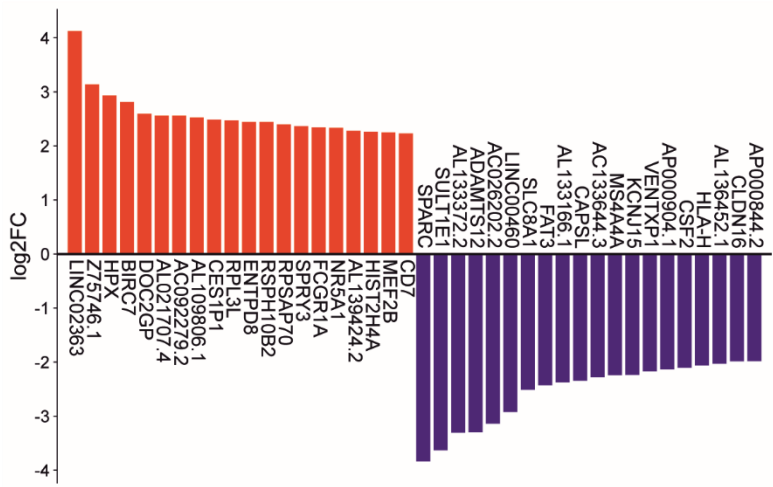

**B**  $\Delta$ HIF1 $\Delta$ EPAS1\_Moli vs  $\Delta$ HIF1 $\Delta$ EPAS1\_Hypoxia

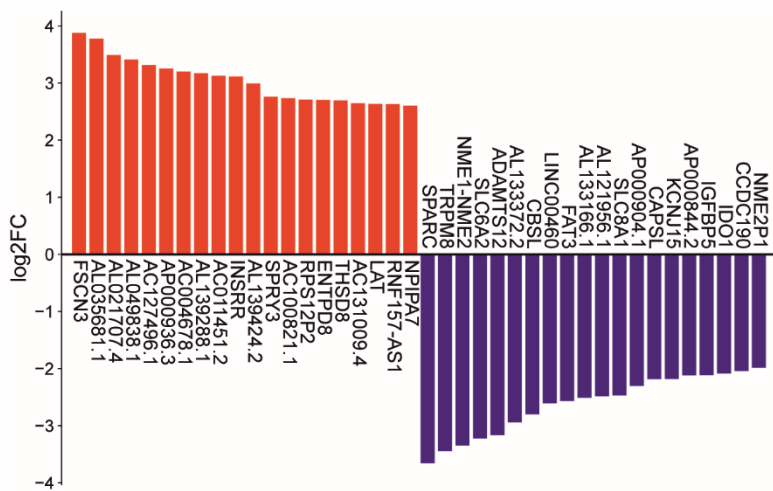

**Figure S10. Top 20 up- and downregulated genes in  $\Delta$ HIF1 $\Delta$ EPAS1 cells treated with molidustat.**

**(A)** Most up- and downregulated genes in  $\Delta$ HIF1 $\Delta$ EPAS1 cells upon molidustat (Moli) treatment compared to normoxia. **(B)** Most up- and downregulated genes in  $\Delta$ HIF1 $\Delta$ EPAS1 cells upon molidustat (Moli) treatment compared to hypoxic conditions.

**Table S1: Nucleotide sequences used for CRISPR-Cas9 primers.**

| Gene                          | Nucleotide sequence (5' to 3')     |
|-------------------------------|------------------------------------|
| HIF1A (guide)                 | CCATCAGCTATTTGCGTGTG               |
| EPAS1 (guide)                 | CAAGGCCTCCATCATGCGAC               |
| Genotyping/ Sequencing        | Nucleotide sequence (5' to 3')     |
| HIF1                          | Forward: GAAAAGTCTCGAGATGCAGCCA    |
|                               | Reverse: GGGAAAAGCCAGTATCTTATTCCTG |
| EPAS1                         | Forward: CCCATGTGAAGCCCTGTTCT      |
|                               | Reverse: CCCATGTTCTTCCCTGGTCC      |
| CBFA2T3<br>(off-target HIF1A) | Forward: GAGGAGCTCAACCACTGGG       |
|                               | Reverse: CTCGGACAAGGTCTGGCTC       |
| ALDH1L1<br>(off-target EPAS1) | Forward: TGATCTCTCAGTGTCACAGCCA    |
|                               | Reverse: GCCCTTCACACCCTTATCC       |

**Table S2: List of antibodies used in the study.**

| Primary Antibodies                   | Origin | Clonality  | Dilution factor | Company        | Catalog nr. |
|--------------------------------------|--------|------------|-----------------|----------------|-------------|
| HIF-1 $\alpha$                       | Mouse  | monoclonal | 1:1.000         | BD Bioscience  | #610959     |
| HIF-2 $\alpha$                       | Rabbit | monoclonal | 1:1.000         | Cell signaling | #7096       |
| CAIX                                 | Mouse  | monoclonal | 1:1.000         | Santa Cruz     | #sc-365900  |
| BNIP3 (D7U1T)                        | Rabbit | monoclonal | 1:1.000         | Cell signaling | #44060      |
| $\alpha$ -Tubulin<br>(clone B-5-1-2) | Mouse  | monoclonal | 1:10.000        | Sigma-Aldich   | #T5168      |
| Secondary Antibodies                 | Origin |            | Dilution factor | Company        | Catalog nr. |
| Mouse-HRP                            | Goat   |            | 1:5.000         | Bio-Rad        | #1706516    |
| Rabbit-HRP                           | Goat   |            | 1:5.000         | Bio-Rad        | #1706515    |
